# Supplementary material for: Assessing the Use of Prescription Drugs in Obese Respondents in the National Health and Nutrition Examination Survey
Source: bioRxiv or medRxiv preprint supplement (doi:10.1101/2021.11.18.21266536), 2022-02-16
Supplement: Supplementary file [file media-1.pdf]

## Supplemental Material

### Use of NHANES Dataset

Table S1 lists the NHANES files, the NHANES variables, the associated questions, and how each variable is referred to in this paper.

**Table S1. NHANES Variables**

| NHANES File                                                    | NHANES Variable Name | NHANES Question                                                                                                                                                  | Reference in the Paper  |
|----------------------------------------------------------------|----------------------|------------------------------------------------------------------------------------------------------------------------------------------------------------------|-------------------------|
| Body Measures                                                  | BMXBMI               | Body mass index                                                                                                                                                  | BMI                     |
| Demographic Variables and Weights                              | SEQN                 | Respondent sequence number                                                                                                                                       | None                    |
| Demographic Variables and Weights                              | RIAGENDR             | Gender                                                                                                                                                           | Sex                     |
| Demographic Variables and Weights                              | RIAAGEYR             | Age in years at screening                                                                                                                                        | Age                     |
| Demographic Variables and Weights                              | RIDRETH1             | Race/Hispanic Origin                                                                                                                                             | Race                    |
| Demographic Variables and Weights                              | WTINIT2YR            | Full sample 2 year interview weight                                                                                                                              | None                    |
| Demographic Variables and Weights                              | INDHHIN2             | Total household income                                                                                                                                           | Annual household income |
| Dietary Supplement Use 30-Day - Individual Dietary Supplements | DSDCOUNT             | Total # of Dietary Supplements Taken? (Includes all supplements and the antacids reported with supplements, but not antacids reported with medications.)         | DS use                  |
| Health Insurance                                               | HIQ011               | Covered by health insurance?                                                                                                                                     | Health Insurance        |
| Income                                                         | INDFMMPI             | Family monthly poverty level index (Family monthly poverty level index, a ratio of monthly family income to the HHS poverty guidelines specific to family size.) | PIR                     |
| Prescription Medications                                       | RXDUSE               | Taken prescription medication, past month                                                                                                                        | RXD use                 |
| Prescription Medications                                       | RXDCount             | Number of prescriptions medications taken                                                                                                                        | Number RXD              |
| Prescription Medications - Drug Information                    | RXDDCN1A             | Drug category name - CAT 1, LEV 1                                                                                                                                | RXD category            |

## Regression Analysis

**Table S2.** Reported prescription drug use by demographic characteristics among obese and control group.

| Variable                                     | Control    |             |       |         | Obese      |             |       |         |
|----------------------------------------------|------------|-------------|-------|---------|------------|-------------|-------|---------|
|                                              | Odds ratio | 95% Wald CL |       | P value | Odds ratio | 95% Wald CL |       | P value |
| <b>Gender</b>                                |            |             |       |         |            |             |       |         |
| Male                                         | 0.572      | 0.538       | 0.607 | <.0001  | 0.552      | 0.508       | 0.6   | <.0001  |
| Female (reference)                           | 1          |             |       |         | 1          |             |       |         |
| <b>Age Group</b>                             |            |             |       |         |            |             |       |         |
| 18-24                                        | 0.258      | 0.21        | 0.316 | <.0001  | 0.298      | 0.224       | 0.395 | <.0001  |
| 25-34                                        | 0.364      | 0.298       | 0.444 | <.0001  | 0.367      | 0.282       | 0.476 | <.0001  |
| 35-44                                        | 0.426      | 0.35        | 0.52  | <.0001  | 0.39       | 0.303       | 0.503 | <.0001  |
| 45-54                                        | 0.531      | 0.436       | 0.646 | <.0001  | 0.569      | 0.443       | 0.73  | <.0001  |
| 55-64                                        | 0.77       | 0.631       | 0.94  | 0.0104  | 0.922      | 0.718       | 1.182 | 0.5207  |
| 65-74                                        | 0.853      | 0.727       | 1.001 | 0.0515  | 0.922      | 0.739       | 1.151 | 0.4742  |
| 75 over (reference)                          | 1          |             |       |         | 1          |             |       |         |
| <b>Race</b>                                  |            |             |       |         |            |             |       |         |
| Mexican American                             | 0.587      | 0.519       | 0.664 | <.0001  | 0.658      | 0.565       | 0.765 | <.0001  |
| Other Hispanic                               | 0.762      | 0.659       | 0.881 | 0.0002  | 0.827      | 0.682       | 1.003 | 0.0541  |
| Non-Hispanic White (reference)               | 1          |             |       |         | 1          |             |       |         |
| Non-Hispanic Black                           | 0.555      | 0.498       | 0.618 | <.0001  | 0.664      | 0.59        | 0.748 | <.0001  |
| Other Race – Including Multi-Racial          | 0.857      | 0.766       | 0.959 | 0.0073  | 1.032      | 0.835       | 1.275 | 0.7723  |
| <b>PIR</b>                                   |            |             |       |         |            |             |       |         |
| 0-1 (reference)                              | 1          |             |       |         | 1          |             |       |         |
| 1-2                                          | 1.177      | 1.062       | 1.304 | 0.0018  | 1.349      | 1.181       | 1.54  | <.0001  |
| 2-3                                          | 1.338      | 1.195       | 1.498 | <.0001  | 1.45       | 1.251       | 1.682 | <.0001  |
| 3-4                                          | 1.515      | 1.344       | 1.707 | <.0001  | 1.812      | 1.547       | 2.122 | <.0001  |
| 4-5                                          | 1.659      | 1.456       | 1.89  | <.0001  | 1.981      | 1.669       | 2.351 | <.0001  |
| >=5                                          | 2.215      | 1.978       | 2.48  | <.0001  | 2.209      | 1.887       | 2.587 | <.0001  |
| <b>Covered by any insurance</b>              |            |             |       |         |            |             |       |         |
| Yes                                          | 1.338      | 1.181       | 1.516 | <.0001  |            |             |       |         |
| No (reference)                               | 1          |             |       |         |            |             |       |         |
| <b>Covered by private insurance</b>          |            |             |       |         |            |             |       |         |
| Yes                                          | 1.191      | 1.072       | 1.324 | 0.0011  | 1.255      | 1.133       | 1.39  | <.0001  |
| No (reference)                               | 1          |             |       |         | 1          |             |       |         |
| <b>Covered by Medicare</b>                   |            |             |       |         |            |             |       |         |
| Yes                                          | 1.217      | 1.029       | 1.439 | 0.0219  | 1.435      | 1.201       | 1.714 | <.0001  |
| No (reference)                               | 1          |             |       |         | 1          |             |       |         |
| <b>Covered by Medicaid</b>                   |            |             |       |         |            |             |       |         |
| Yes                                          | 0.792      | 0.673       | 0.931 | 0.0048  |            |             |       |         |
| No (reference)                               | 1          |             |       |         |            |             |       |         |
| <b>Covered by other government insurance</b> |            |             |       |         |            |             |       |         |
| Yes                                          |            |             |       |         | 1.402      | 1.201       | 1.638 | <.0001  |
| No (reference)                               |            |             |       |         | 1          |             |       |         |

**Table S3.** Reported prescription dietary supplements use by demographic characteristics among obese and control group.

| Variable                                     | Control    |             |         |        | Obese      |             |         |        |
|----------------------------------------------|------------|-------------|---------|--------|------------|-------------|---------|--------|
|                                              | Odds ratio | 95% Wald CL | P value |        | Odds ratio | 95% Wald CL | P value |        |
| <b>Gender</b>                                |            |             |         |        |            |             |         |        |
| Male                                         | 0.539      | 0.505       | 0.575   | <.0001 | 0.564      | 0.514       | 0.619   | <.0001 |
| Female (reference)                           | 1          |             |         |        | 1          |             |         |        |
| <b>Age Group</b>                             |            |             |         |        |            |             |         |        |
| 18-24                                        | 0.11       | 0.085       | 0.142   | <.0001 | 0.078      | 0.049       | 0.124   | <.0001 |
| 25-34                                        | 0.133      | 0.104       | 0.172   | <.0001 | 0.117      | 0.074       | 0.185   | <.0001 |
| 35-44                                        | 0.174      | 0.135       | 0.223   | <.0001 | 0.229      | 0.146       | 0.361   | <.0001 |
| 45-54                                        | 0.287      | 0.223       | 0.368   | <.0001 | 0.412      | 0.262       | 0.649   | 0.0001 |
| 55-64                                        | 0.539      | 0.418       | 0.696   | <.0001 | 0.74       | 0.468       | 1.17    | 0.198  |
| 65-74                                        | 0.641      | 0.509       | 0.807   | 0.0002 | 0.797      | 0.505       | 1.258   | 0.3303 |
| 75 over (reference)                          | 1          |             |         |        | 1          |             |         |        |
| <b>Race</b>                                  |            |             |         |        |            |             |         |        |
| Mexican American                             | 0.479      | 0.419       | 0.547   | <.0001 | 0.442      | 0.377       | 0.518   | <.0001 |
| Other Hispanic                               | 0.586      | 0.501       | 0.684   | <.0001 | 0.43       | 0.349       | 0.53    | <.0001 |
| Non-Hispanic White (reference)               | 1          |             |         |        | 1          |             |         |        |
| Non-Hispanic Black                           | 0.603      | 0.539       | 0.675   | <.0001 | 0.613      | 0.539       | 0.697   | <.0001 |
| Other Race – Including Multi-Racial          | 0.504      | 0.447       | 0.568   | <.0001 | 0.647      | 0.513       | 0.814   | 0.0002 |
| <b>PIR</b>                                   |            |             |         |        |            |             |         |        |
| 0-1 (reference)                              | 1          |             |         |        |            |             |         |        |
| 1-2                                          | 0.932      | 0.835       | 1.04    | 0.2088 |            |             |         |        |
| 2-3                                          | 1.003      | 0.888       | 1.132   | 0.9611 |            |             |         |        |
| 3-4                                          | 0.921      | 0.81        | 1.047   | 0.2079 |            |             |         |        |
| 4-5                                          | 1.186      | 1.033       | 1.362   | 0.0153 |            |             |         |        |
| >=5                                          | 1.243      | 1.103       | 1.4     | 0.0003 |            |             |         |        |
| <b>Covered by any insurance</b>              |            |             |         |        |            |             |         |        |
| Yes                                          | 1.516      | 1.241       | 1.851   | <.0001 | 1.495      | 1.106       | 2.022   | 0.0089 |
| No (reference)                               | 1          |             |         |        | 1          |             |         |        |
| <b>Covered by private insurance</b>          |            |             |         |        |            |             |         |        |
| Yes                                          | 1.287      | 1.07        | 1.547   | 0.0073 | 1.57       | 1.185       | 2.08    | 0.0017 |
| No (reference)                               | 1          |             |         |        | 1          |             |         |        |
| <b>Covered by Medicare</b>                   |            |             |         |        |            |             |         |        |
| Yes                                          | 2.563      | 2.079       | 3.159   | <.0001 | 3.938      | 2.886       | 5.373   | <.0001 |
| No (reference)                               | 1          |             |         |        | 1          |             |         |        |
| <b>Covered by Medicaid</b>                   |            |             |         |        |            |             |         |        |
| Yes                                          | 2.016      | 1.617       | 2.514   | <.0001 | 2.5        | 1.831       | 3.415   | <.0001 |
| No (reference)                               | 1          |             |         |        | 1          |             |         |        |
| <b>Covered by other government insurance</b> |            |             |         |        |            |             |         |        |
| Yes                                          | 1.814      | 1.479       | 2.225   | <.0001 | 2.15       | 1.596       | 2.898   | <.0001 |
| No (reference)                               | 1          |             |         |        | 1          |             |         |        |

## Performance of the Machine Learning Models for Classifying RXD and DS Use

**Table S4.** Performance of machine learning models for classifying DS use

| Model                      | With only demographic variables as predictors |              |              |             |            | After adding "RXD use" as a predictor |              |              |              |              |
|----------------------------|-----------------------------------------------|--------------|--------------|-------------|------------|---------------------------------------|--------------|--------------|--------------|--------------|
|                            | Accuracy                                      | Precision    | Recall       | F1          | AUROC      | Accuracy                              | Precision    | Recall       | F1           | AUROC        |
| <b>Logistic Regression</b> | <b>64.63</b>                                  | <b>0.633</b> | <b>0.604</b> | <b>0.62</b> | <b>0.7</b> | <b>65.05</b>                          | <b>0.636</b> | <b>0.614</b> | <b>0.625</b> | <b>0.703</b> |
| Naïve Bayes                | 64.4                                          | 0.621        | 0.641        | 0.63        | 0.698      | 64.1                                  | 0.615        | 0.647        | 0.631        | 0.699        |
| Random Forest              | 63.07                                         | 0.612        | .602         | .607        | 0.67       | 62.41                                 | 0.602        | 0.609        | 0.606        | 0.664        |
| SMO (SVM)                  | 61.27                                         | 0.617        | 0.482        | 0.54        | 0.606      | 64.6                                  | 0.628        | 0.622        | 0.925        | 0.645        |

**Table S5.** Performance of machine learning models for classifying RXD use

| Model                      | With only demographic variables as predictors |             |              |             |              | After adding "DS use" as a predictor |              |              |              |              |
|----------------------------|-----------------------------------------------|-------------|--------------|-------------|--------------|--------------------------------------|--------------|--------------|--------------|--------------|
|                            | Accuracy                                      | Precision   | Recall       | F1          | AUROC        | Accuracy                             | Precision    | Recall       | F1           | AUROC        |
| <b>Logistic Regression</b> | <b>74.27</b>                                  | <b>0.77</b> | <b>0.753</b> | <b>0.76</b> | <b>0.816</b> | <b>74.3</b>                          | <b>0.768</b> | <b>0.758</b> | <b>0.763</b> | <b>0.818</b> |
| Naïve Bayes                | 73.9                                          | 0.759       | 0.765        | 0.76        | 0.813        | 73.84                                | 0.757        | 0.768        | 0.762        | 0.813        |
| Random Forest              | 73                                            | 0.745       | 0.768        | 0.76        | 0.799        | 72.37                                | 0.742        | 0.757        | 0.75         | 0.791        |
| SMO (SVM)                  | 71.64                                         | 0.749       | 0.722        | 0.74        | 0.716        | 71.64                                | 0.68         | 0.71         | 0.694        | 0.716        |

**Table S6.** Performance of machine learning models for classifying DS use using PIR

| Model                      | With only demographic variables as predictors |              |              |             |              | After adding "RXD use" as a predictor |             |              |              |              |
|----------------------------|-----------------------------------------------|--------------|--------------|-------------|--------------|---------------------------------------|-------------|--------------|--------------|--------------|
|                            | Accuracy                                      | Precision    | Recall       | F1          | AUROC        | Accuracy                              | Precision   | Recall       | F1           | AUROC        |
| <b>Logistic Regression</b> | <b>65.16</b>                                  | <b>0.638</b> | <b>0.613</b> | <b>0.63</b> | <b>0.705</b> | <b>65.31</b>                          | <b>0.64</b> | <b>0.614</b> | <b>0.626</b> | <b>0.708</b> |
| Naïve Bayes                | 64.65                                         | 0.625        | 0.634        | 0.63        | 0.701        | 64.56                                 | 0.62        | 0.652        | 0.636        | 0.703        |
| Random Forest              | 63.97                                         | 0.625        | 0.6          | 0.61        | 0.689        | 63.54                                 | 0.617       | 0.611        | 0.614        | 0.682        |
| SMO (SVM)                  | 64.41                                         | 0.638        | 0.577        | 0.61        | 0.641        | 64.98                                 | 0.639       | 0.601        | 0.619        | 0.647        |

**Table S7.** Performance of machine learning models for classifying RXD use using PIR

| Model                      | With only demographic variables as predictors |              |             |             |              | After adding "DS use" as a predictor |              |              |              |              |
|----------------------------|-----------------------------------------------|--------------|-------------|-------------|--------------|--------------------------------------|--------------|--------------|--------------|--------------|
|                            | Accuracy                                      | Precision    | Recall      | F1          | AUROC        | Accuracy                             | Precision    | Recall       | F1           | AUROC        |
| <b>Logistic Regression</b> | <b>74.26</b>                                  | <b>0.772</b> | <b>0.75</b> | <b>0.76</b> | <b>0.816</b> | <b>74.27</b>                         | <b>0.769</b> | <b>0.756</b> | <b>0.762</b> | <b>0.818</b> |
| Naïve Bayes                | 73.71                                         | 0.756        | 0.766       | 0.76        | 0.81         | 73.55                                | 0.755        | 0.763        | 0.759        | 0.809        |
| Random Forest              | 73.62                                         | 0.755        | 0.764       | 0.76        | 0.809        | 73.39                                | 0.75         | 0.769        | 0.759        | 0.803        |
| SMO (SVM)                  | 71.64                                         | 0.749        | 0.722       | 0.74        | 0.716        | 71.64                                | 0.749        | 0.722        | 0.735        | 0.716        |

**Table S8.** Performance of machine learning models for classifying RXD use into categories

| Model                      | Classifying into drug count groups |              |              |              |             |
|----------------------------|------------------------------------|--------------|--------------|--------------|-------------|
|                            | Accuracy                           | Precision    | Recall       | F1           | AUROC       |
| <b>Logistic Regression</b> | <b>53.26</b>                       | <b>0.491</b> | <b>0.533</b> | <b>0.492</b> | <b>0.76</b> |
| Naïve Bayes                | 52.69                              | 0.496        | 0.527        | 0.501        | 0.755       |
| Random Forest              | 50.12                              | 0.473        | 0.501        | 0.482        | 0.723       |
| SVM (SVM)                  | 50.94                              | --           | 0.509        |              | 0.657       |
